# Supplementary material for: The T3SS Effector EspT Defines a New Category of Invasive Enteropathogenic E. coli (EPEC) Which Form Intracellular Actin Pedestals
Source: PubMed Central journal article supplement (PMC2782363; doi:10.1371/journal.ppat.1000683), 2009-12-11

S1

EPEC pCX340::*NleD*

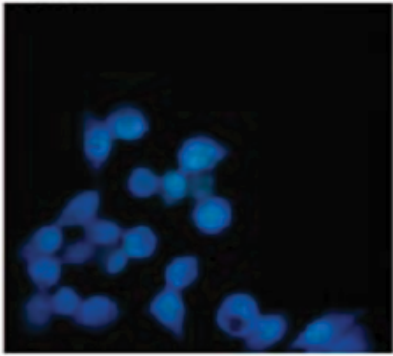

EPECDescN pCX340::*espT*

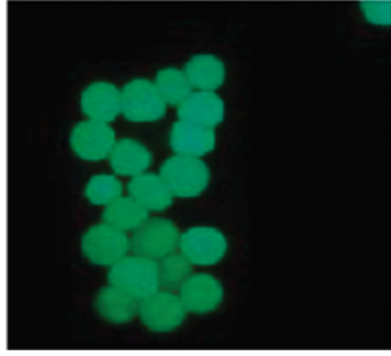

EPEC pCX340::*espT*

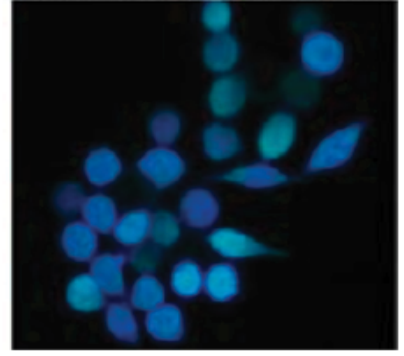

Supplement: ppat.1000683.s001.pdf [file ppat.1000683.s001.pdf]
