# Supplementary material for: The T3SS Effector EspT Defines a New Category of Invasive Enteropathogenic E. coli (EPEC) Which Form Intracellular Actin Pedestals
Source: PubMed Central journal article supplement (PMC2782363; doi:10.1371/journal.ppat.1000683), 2009-12-11

S2

Actin

Wave2

IRSp53

Merge

pRK5::  
*espT*  
HeLa

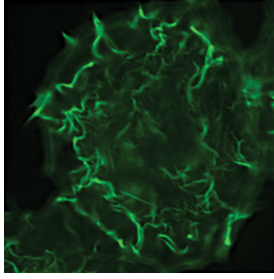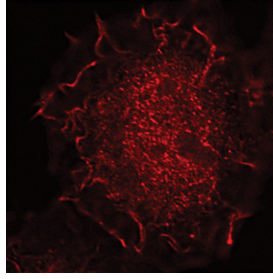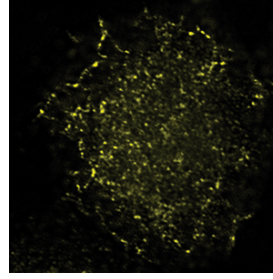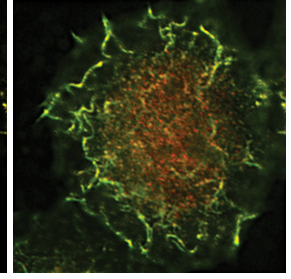

pRK5::  
*espT*  
Swiss 3T3

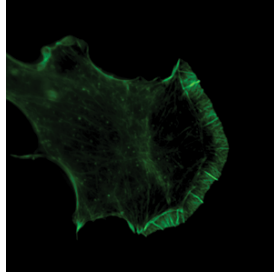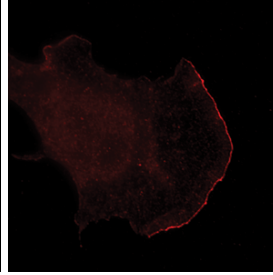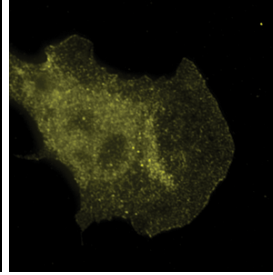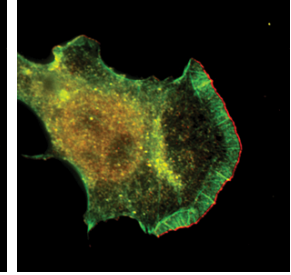

Supplement: ppat.1000683.s002.pdf [file ppat.1000683.s002.pdf]
