# Supplementary material for: The T3SS Effector EspT Defines a New Category of Invasive Enteropathogenic E. coli (EPEC) Which Form Intracellular Actin Pedestals
Source: PubMed Central journal article supplement (PMC2782363; doi:10.1371/journal.ppat.1000683), 2009-12-11

S6

Extracellular  
labelling

Total labelling

Actin

Merge

pRK5::  
*espT*  
HeLa +  
 $\Delta$ escN

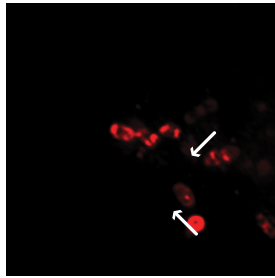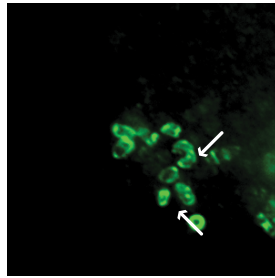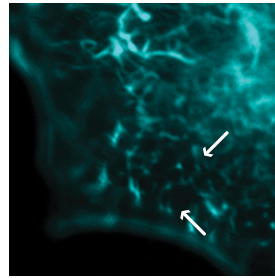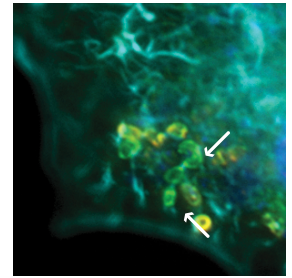

Supplement: ppat.1000683.s006.pdf [file ppat.1000683.s006.pdf]
